# Supplementary material for: Murine transcription factor Math6 is a regulator of placenta development
Source: PubMed Central journal article supplement (PMC6177472; doi:10.1038/s41598-018-33387-x), 2018-10-09
Supplement: 41598_2018_33387_MOESM1_ESM.pdf [file 41598_2018_33387_MOESM1_ESM.pdf]

## Supplementary information

Title: Murine transcription factor Math6 is a regulator of placenta development

Marion Böing<sup>1</sup>, Beate Brand-Saberi<sup>1\*</sup>, Markus Napirei<sup>1</sup>

<sup>1</sup> Department of Anatomy and Molecular Embryology, Ruhr-University Bochum, Germany

\*Corresponding author: Beate Brand-Saberi, Ruhr-University Bochum, Medical Faculty, Anatomy and Molecular Embryology, Building MA 5 Süd, R 158, Universitätsstr. 150, 44801 Bochum, Germany, Tel.: +49 (0)234 32 27780, Fax: +49 (0)234 32 14474, e-Mail: Beate.Brand-Saberi@rub.de

Table S1: Breeding statistics of *Math6* WT and KO mice.

| <b><i>Math6</i> genotype</b> |      | <b>matings</b> | <b>litters</b> | <b>pups</b> | <b>pups / litter</b> |
|------------------------------|------|----------------|----------------|-------------|----------------------|
| female                       | male |                |                |             |                      |
| +/+                          | +/+  | 9              | 25             | 168         | 6,7                  |
| +/-                          | -/-  | 10             | 25             | 140         | 5,6                  |
| -/-                          | +/+  | 6              | 0              | 0           | /                    |
| -/-                          | -/-  | 6              | 0              | 0           | /                    |

Table S2: Placenta phenotype and reproductive rate in dependence of the parental *Math6* genotype (E10.5: +/+ x +/+ and -/- x -/- n=7 and -/- x -/- n=5; +/- x -/- n=3).

| parental <i>Math6</i> genotype |     | embryonic <i>Math6</i> genotype | morphology of the decidua at day E10.5                             | reproductive rate                          |
|--------------------------------|-----|---------------------------------|--------------------------------------------------------------------|--------------------------------------------|
| ♀                              | ♂   | ♀ / ♂                           |                                                                    |                                            |
| +/+                            | +/+ | +/+                             | normal morphology                                                  | viable offspring                           |
| +/-                            | -/- | +/-                             | normal morphology                                                  | viable offspring                           |
|                                |     | -/-                             |                                                                    |                                            |
| -/-                            | +/+ | +/-                             | altered shape, reduced uNK cells, impaired blood vessel remodeling | no offspring, uterine and vaginal bleeding |
|                                | -/- | -/-                             |                                                                    |                                            |

Table S3: Uterine implantation statistics in dependence of the maternal *Math6* genotype as evaluated by gross anatomical observation on day E10.5, E13.5 and E18.5.

| <b>Maternal <i>Math6</i> genotype</b> | <b>total No. of implantations</b> | <b>total No. of alive implantations</b> | <b>mean No. of implantations</b> | <b>mean No. of alive implantations</b> |
|---------------------------------------|-----------------------------------|-----------------------------------------|----------------------------------|----------------------------------------|
| +/+                                   | 46                                | 42                                      | 7,7                              | 7,0                                    |
| -/-                                   | 71                                | 22                                      | 6,5                              | 2,0                                    |

Table S4: Primer sequences

| Gene                | Forward primer             | Reverse primer                  | Ref. |
|---------------------|----------------------------|---------------------------------|------|
| Desmin              | CGAGGAGAGCAGGATCAACC       | TCTCCATCCCAGGTCTCAAT            |      |
| Gja1                | ATTTTCGTTCCCGTGGAGGTG      | TTTTGCCGCCTAGCTATCCC            |      |
| Hand2               | CAAGATCAAGACTGCGCC         | TCTCCGTTCTGGTCGCCTT             |      |
| Prl3c1              | TGACTCAAGCACGCACCTG        | TCCGGTCATATCGTGTGGCA            |      |
| Prl8a2              | AGCCAGAAATCACTGCCACT       | TGATCCATGCACCCATAAAA            | 57   |
| IGFBP1              | CATCCTGTGGAACGCCATCA       | AGGGCTCCTTCCATTTCTTGAG          |      |
| IGFBP4              | CTTCCACCCCAAACAGTGTCA      | GTCTTCCGATCCACACACCA            |      |
| CD31                | GCGGTGGTTGTCATTGGAGTG      | GTTGGAGTTCAGAAGTGGAGCAG         | 57   |
| Mmp9                | CTCTGCTGCCCTTACCAG         | AGCGGTACAAGTATGCCTCTGC          |      |
| Ccnd3               | CCTCCTACTTCCAGTGCCTG       | GGCAGACGGTACCTAGAAGC            |      |
| Klrg1               | AGGGAGTGAAGCTGTTTGGAG      | CCTCCAGCCATCAATGTTCTT           |      |
| Gzma                | CCTGAAGGAGGCTGTGAAAGAA     | CGCCAGCACAGATGGTATTTG           |      |
| Prf1                | TCTTGGTGGGACTTCAGCTTTC     | TCTGCTTGCAATTCTGACCGA           |      |
| Gcm1                | TGCTCACCTATGGCTCTCCT       | AAAATTCTGCCAAGCCCTTT            | 46   |
| Hand1               | GCAAGCGGAAAAGGGAGTTG       | GGTGCGCCCTTTAATCCTCT            |      |
| Tpbpa               | CCAGCACAGCTTTGGACATCA      | AGCATCCAACGCGCTTCA              | 46   |
| Prl3d               | TGGAGCCTACATTGTGGTGGA      | TGGCAGTTGGTTTGGAGGA             | 46   |
| Pcdh12              | CCTAAGGGACTCTGCTCACG       | CAGTACAGCCAGGCAGATCA            |      |
| Gapdh               | CAGCCTCGTCCCGTAGACA        | CGCTCCTGGAAGATGGTGAT            | 18   |
|                     |                            |                                 |      |
| <b>Math6 Primer</b> |                            |                                 |      |
| Primer 1-2 (qPCR)   | CGTCAATTTACACGTAA          | AAGAGACTCACAGTGGTGTCT           | 18   |
| Primer 3-5          | GTGCCGTGCTACTCCTATGG       | CTGAGAGATGGTACACGGGC            |      |
| Primer 4-5          | GAGCCAAGAAGCGGAAGGAG       | CTGAGAGATGGTACACGGGC            |      |
| Probe               | GTTTCTTTTTCTAGCCCCAACCATTC | GGTATAATAAAGCATCCATACTGCCTTGTCC |      |
| Genotyping WT       | CATAAGGAGCCAGAGGTGCC       | CTTCTACCTCCCACCCGAAC            |      |
| Genotyping KO       | CATAAGGAGCCAGAGGTGCC       | GCATACATTATACGAAGTTATATGCATCAC  |      |

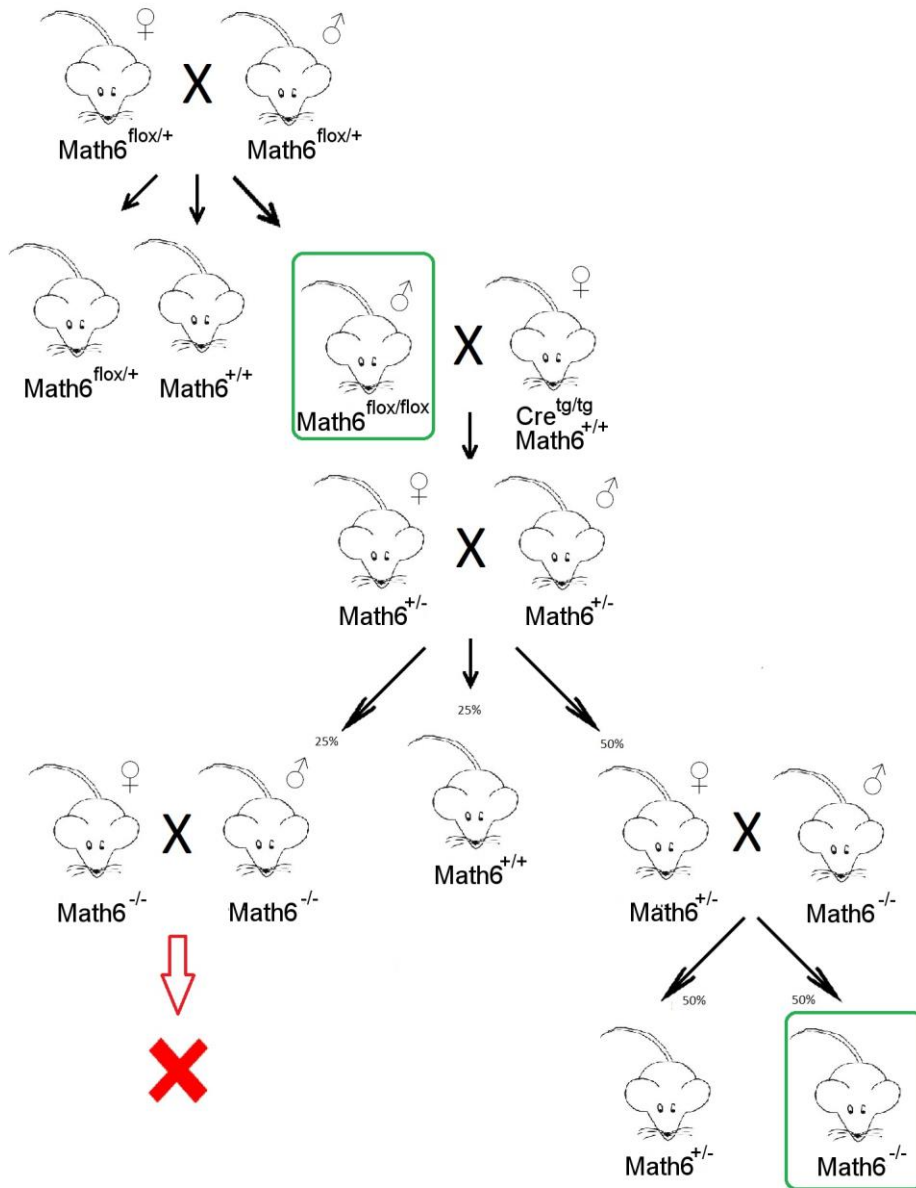

Figure S1: Breeding strategy of *Math6*<sup>flox/+</sup> mice (*Math6* exon 1 flanked by *loxP*-recombination sites) for receiving and maintaining homozygous *Math6* KO (*Math6*<sup>-/-</sup>) mice. *Cre*<sup>tg/tg</sup> = “deleter” mouse homozygous for a ubiquitously expressed *Cre-recombinase* transgene.

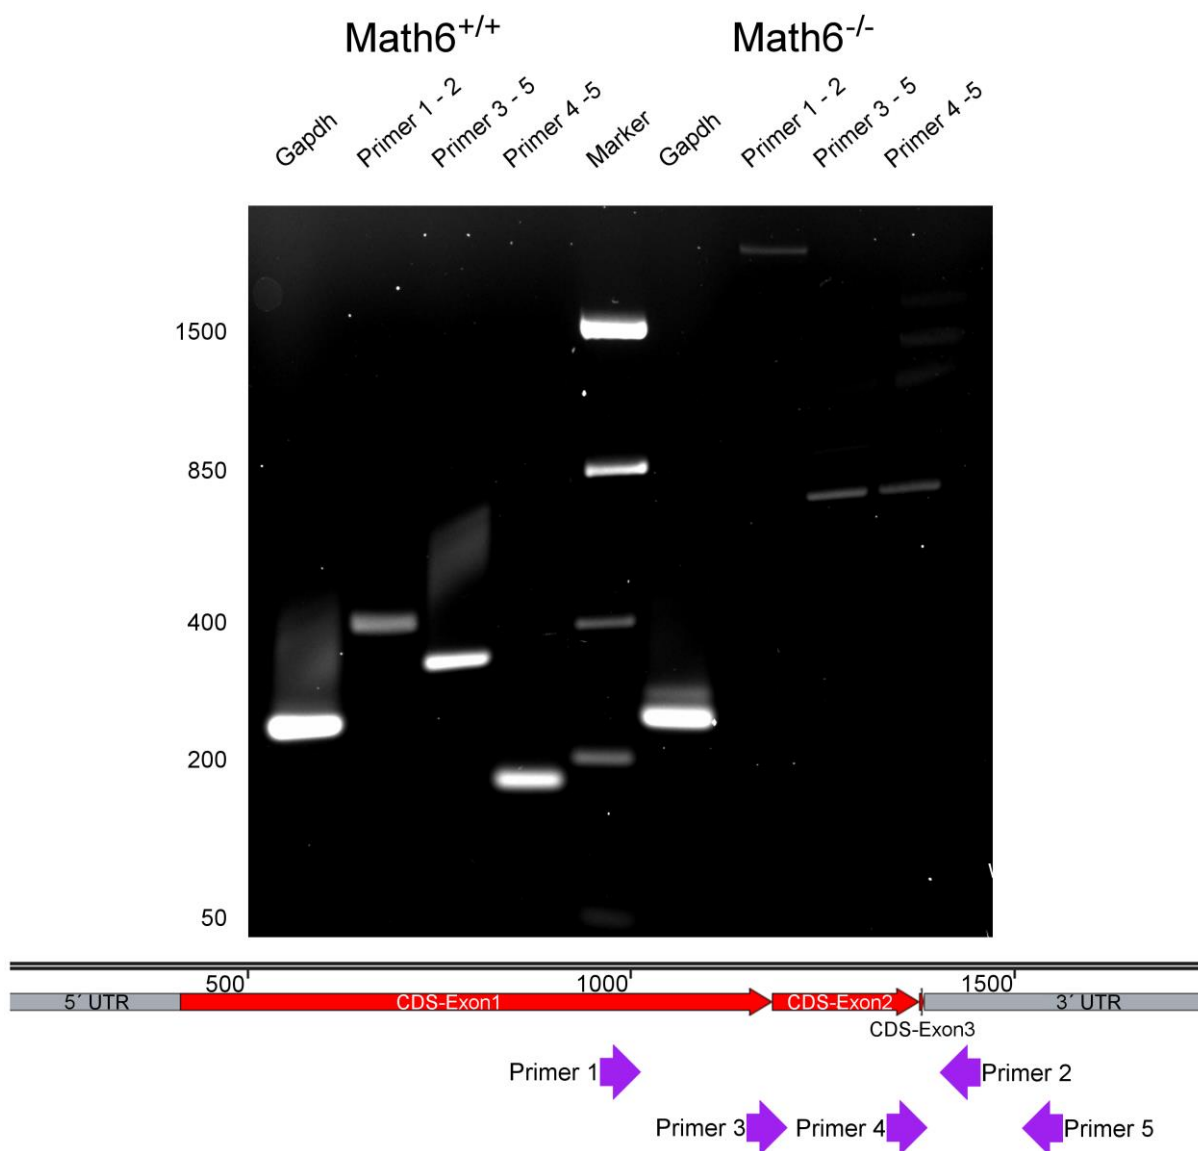

Figure S2: Representative gel-electrophoresis of *Math6* specific RT-PCR samples obtained from WT and KO mice. The localization of the primers used are indicated within the scheme of the *Math6* mRNA below the gel photo (length of the DNA amplificate with primers 1+2: 430 bp; primers 3+5: 346 bp; primers 4+5: 171 bp). In *Math6* KO mice no *Math6* related transcripts could be detected.

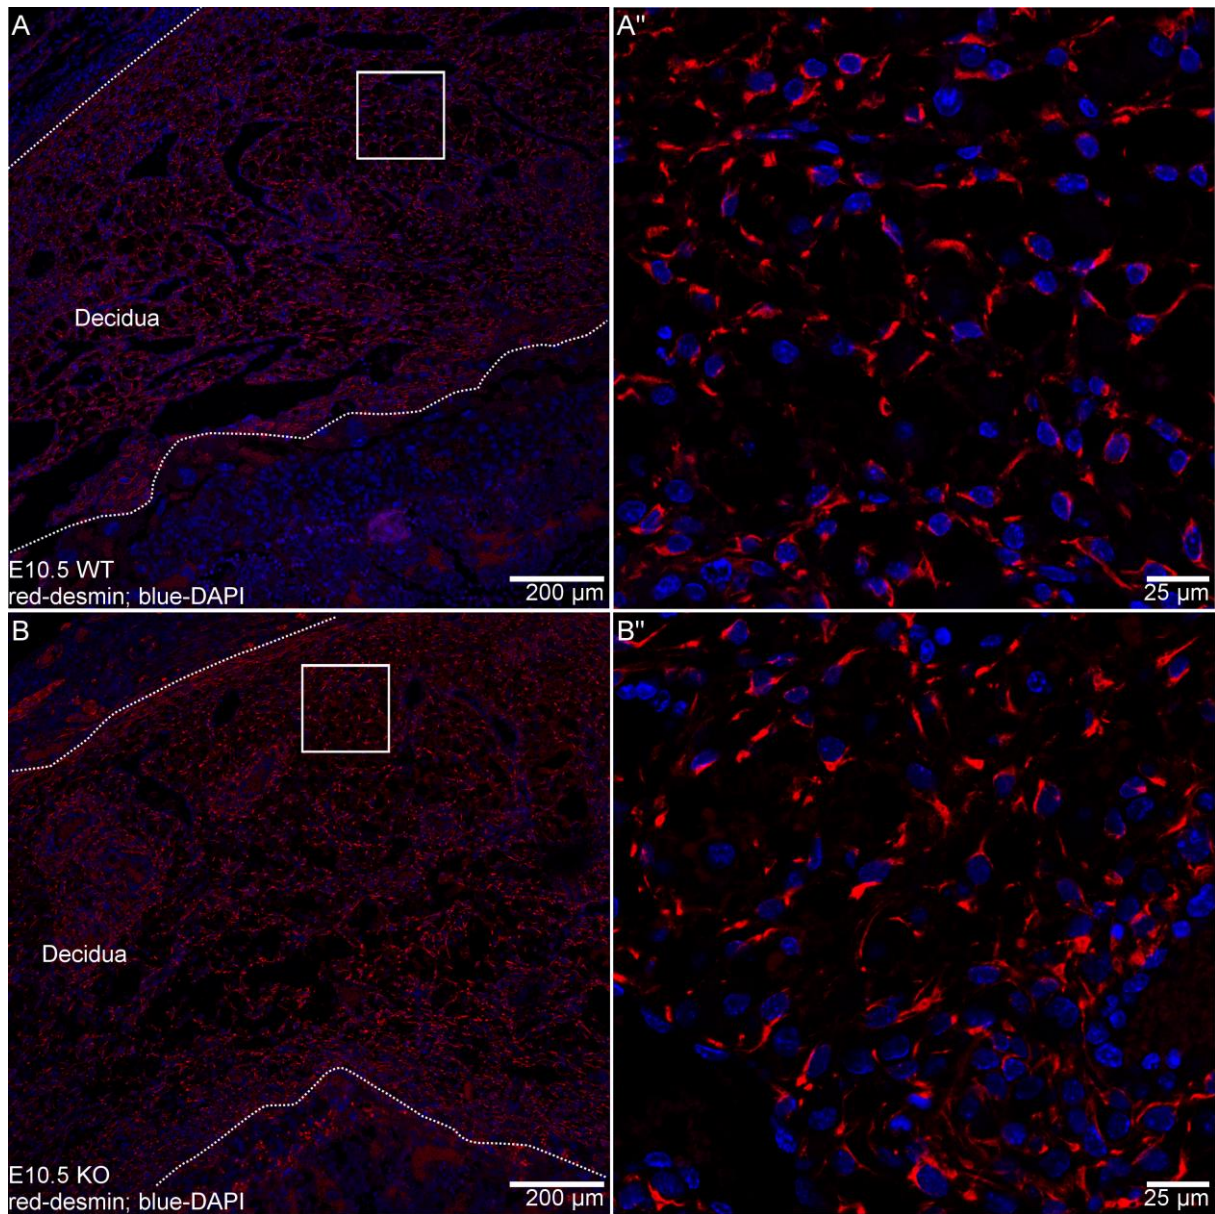

Figure S3: Qualitative analysis of decidual cells as detected by anti-desmin immuno- (red) and nuclear counterstaining by DAPI (blue). The amount of decidual cells is apparently not altered between placentas derived from WT in comparison to those from *Math6*<sup>-/-</sup> (KO) females.



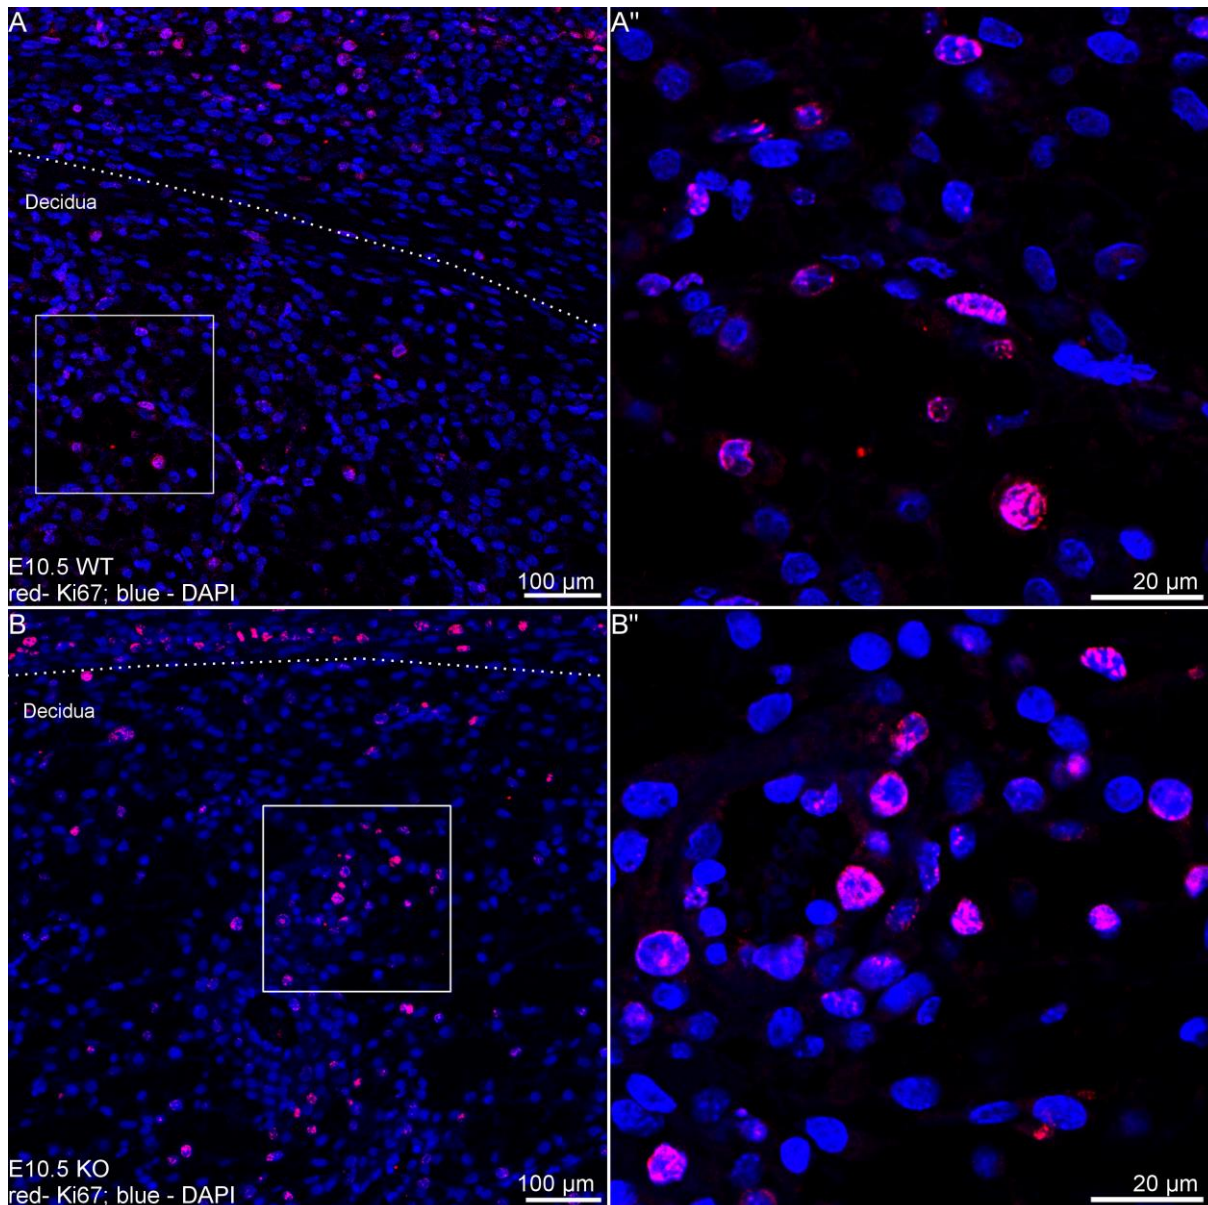

Figure S4: Qualitative analysis of proliferating decidual cells as detected by anti-Ki-67 immuno- (red) and nuclear counterstaining by DAPI (blue). The cell proliferation is apparently not altered between the maternal part of placentas derived from WT in comparison to those from *Math6*<sup>-/-</sup> (KO) females.

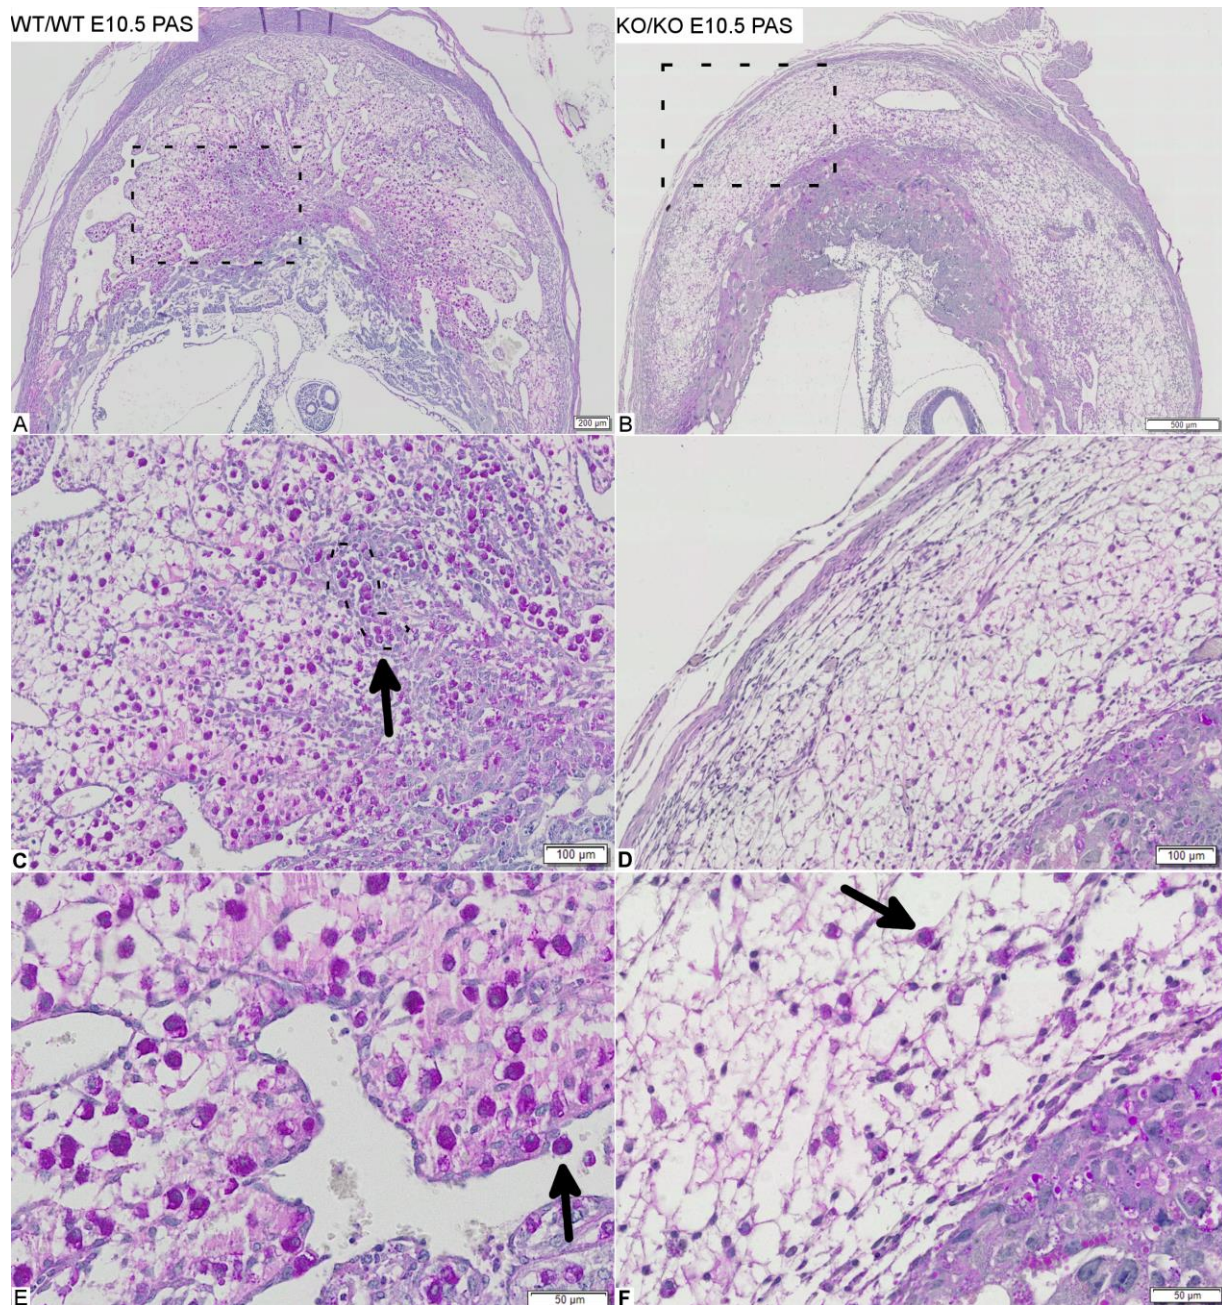

Figure S5: Qualitative analysis of uterine natural killer cells (uNK) in the placenta as detected by PAS-staining. The amount of uNK cells is apparently reduced in the decidua of placentas derived from *Math6*<sup>-/-</sup> (KO) in comparison to those from WT females.

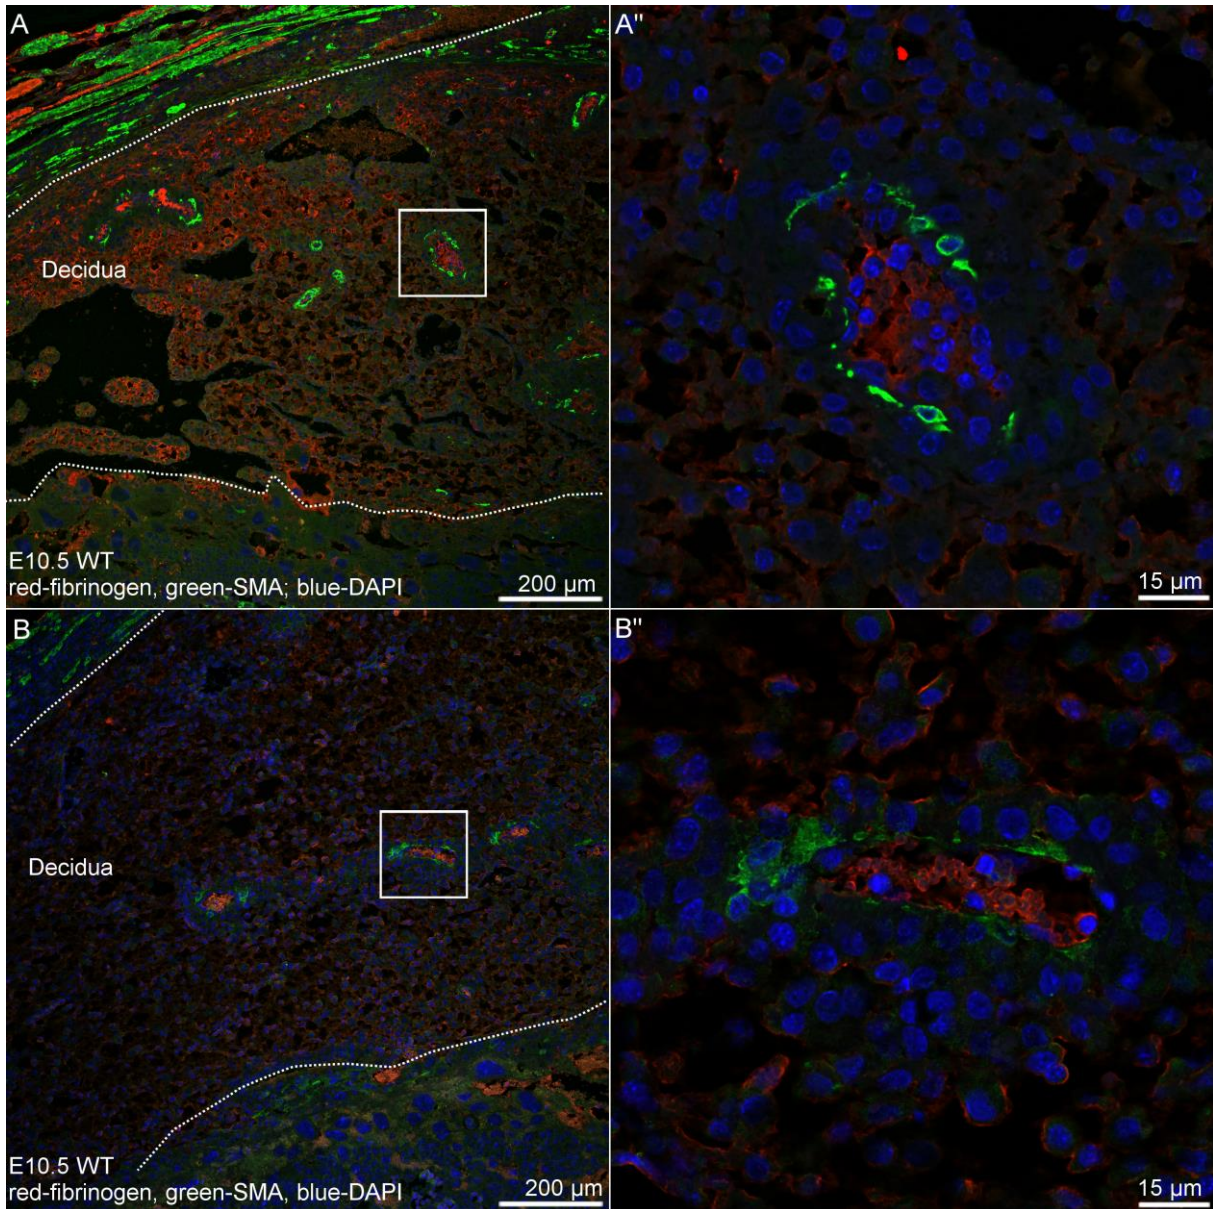

Figure S6: Qualitative analysis of spiral artery morphology detected by anti-alpha smooth-muscle-actin immuno- (green) and nuclear counterstaining by DAPI (blue). The anti-fibrinogen immunostaining (red) serves for better orientation within the sections. The amount of spiral arteries appeared reduced in the decidua of placentas derived from *Math6*<sup>-/-</sup>(KO) compared to those from WT females. However, the *Tunica media* of these arteries was apparently not altered.

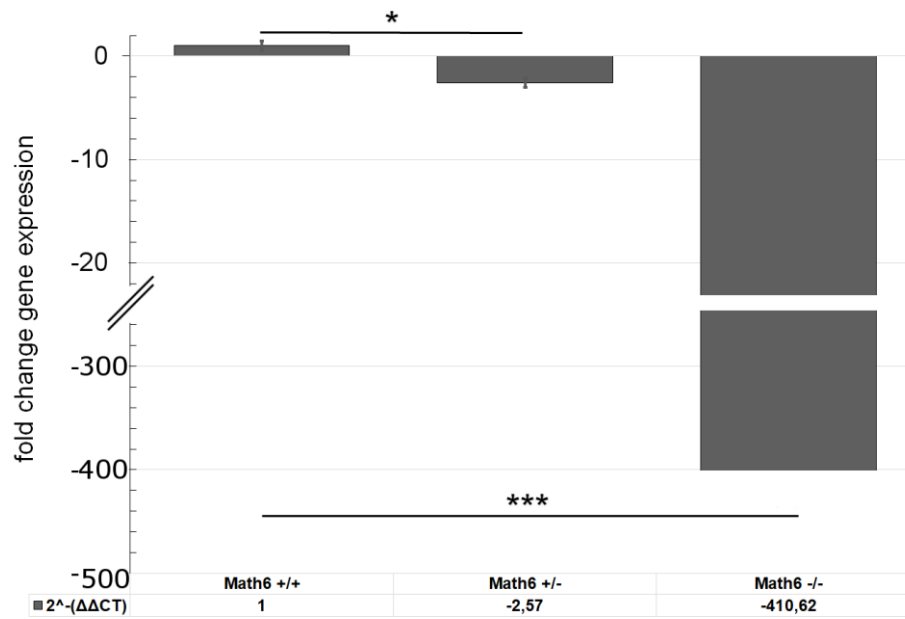

Figure S7: Detection of a *Math6* gene dosage effect with respect to the expression level in the testis of mice of all three genotypes. Heterozygous *Math6* gene expression leads to a 2.57-fold reduction of the mRNA level, whereas in homozygous KO mice the expression level was completely abrogated. Data are presented as mean  $\pm$ SEM; n=3; \*\*\* $\leq$  0,001 p; \* p $\leq$  0,05

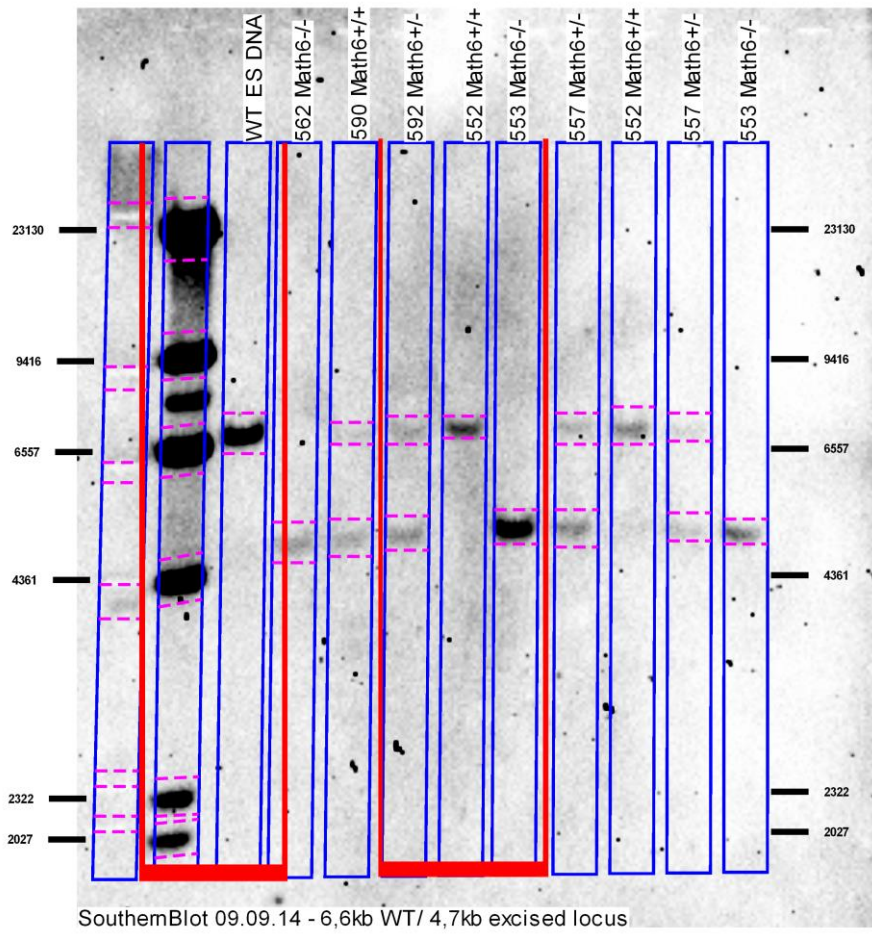

Figure S8: Full picture of the Southern Blot, which is partially presented in Fig.1B.
